# Supplementary material for: Synthesis and characterization of a novel pH-responsive drug-releasing nanocomposite hydrogel for skin cancer therapy and wound healing
Source: Royal Society of Chemistry journal article supplement (doi:10.1039/d1tb01934a), 2021-01-01
Supplement: d1tb01934a1.pdf [file d1tb01934a1.pdf]

# Synthesis and Characterization of a Novel pH-Responsive Drug-Releasing Nanocomposite Hydrogel for Skin Cancer Therapy and Wound Healing

Andrea Gonsalves<sup>1</sup>, Pranjali Tambe<sup>2,3</sup>, Duong Le<sup>1</sup>, Dheeraj Thakore<sup>2,3</sup>, Aniket S.  
Wadajkar<sup>2,3,4,5</sup>, Jian Yang<sup>6</sup>, Kytai T. Nguyen<sup>2,3</sup>, Jyothi U. Menon<sup>1,7\*</sup>

<sup>1</sup> Department of Biomedical and Pharmaceutical Sciences, College of Pharmacy,  
University of Rhode Island, Kingston, RI 02881, USA

<sup>2</sup> Department of Bioengineering, University of Texas at Arlington, Arlington, TX 76019,  
USA

<sup>3</sup> Department of Biomedical Engineering, University of Texas Southwestern Medical  
Center, Dallas, TX 75390, USA

<sup>4</sup> Department of Neurosurgery, University of Maryland School of Medicine, Baltimore,  
MD 21201, USA

<sup>5</sup> Marlene and Stewart Greenebaum Comprehensive Cancer Center, University of  
Maryland School of Medicine, Baltimore, MD 21201, USA

<sup>6</sup> Department of Biomedical Engineering, Pennsylvania State University, University  
Park, PA 16802, USA

<sup>7</sup> Department of Chemical Engineering, University of Rhode Island, Kingston, RI 02881,  
USA

## **\*Corresponding author**

Dr. Jyothi U. Menon

Department of Biomedical and Pharmaceutical Sciences

University of Rhode Island

7 Greenhouse Road, Kingston, RI 02881

TEL: 401-874-4914, FAX: 401-874-5787

Email: [jmenon@uri.edu](mailto:jmenon@uri.edu)

**Table S1.** Dynamic light scattering analysis of PLGA-CMC NPs in terms of average diameter, surface charge and polydispersity index.

| NP type | Size (nm) | Zeta-potential (mV) | Polydispersity index |
|---------|-----------|---------------------|----------------------|
| PC-0.5  | 190 ± 8   | -27.9 ± 0.3         | 0.05                 |
| PC-2.5  | 187 ± 13  | -26.6 ± 0.4         | 0.17                 |

**Table S2.** Low and high levels of formulation factors (PEGMC, PEGDA and TEMED) for the factorial design.

| Factor | Units | Set values |      | Generated values |           |         |         |
|--------|-------|------------|------|------------------|-----------|---------|---------|
|        |       | Low        | High | Mean             | Std. Dev. | Minimum | Maximum |
| PEGMC  | mg/ml | 100        | 200  | 150.00           | 42.39     | 65.91   | 234.09  |
| PEGDA  | mg/ml | 50         | 100  | 75.00            | 21.20     | 32.96   | 117.04  |
| TEMED  | µL/ml | 10         | 20   | 15.00            | 4.24      | 6.59    | 23.41   |

Note: APS was added at fixed ratios to TEMED: 8 mg per 10 µl TEMED.

**Table S3.** Model selection with Design Expert software.

|                     |                   |                    |            |
|---------------------|-------------------|--------------------|------------|
|                     |                   |                    |            |
| <b>Study Type</b>   | Response Surface  | <b>Subtype</b>     | Randomized |
| <b>Design Type</b>  | Central Composite | <b>Combination</b> | 20         |
| <b>Design Model</b> | Quadratic         | <b>Blocks</b>      | No Blocks  |

**Table S4.** A full-factorial design for the high and low values of the tested formulation factors. The half-factorial combination runs used in the experiments are highlighted in bold.

| Combination | Factors |
|-------------|---------|
|-------------|---------|

|           | <b>PEGMC</b> | <b>PEGDA</b> | <b>TEMED</b> |
|-----------|--------------|--------------|--------------|
| order     | mg/ml        | mg/ml        | uL/mL        |
| 1         | 150          | 75           | 6.59         |
| 2         | 150          | 75           | 23.41        |
| 3         | 150          | 75           | 15           |
| 4         | 150          | 75           | 15           |
| <b>5</b>  | <b>200</b>   | <b>100</b>   | <b>10</b>    |
| <b>6</b>  | <b>200</b>   | <b>50</b>    | <b>20</b>    |
| 7         | 150          | 75           | 15           |
| 8         | 150          | 75           | 15           |
| 9         | 150          | 75           | 15           |
| <b>10</b> | <b>200</b>   | <b>50</b>    | <b>10</b>    |
| <b>11</b> | <b>100</b>   | <b>100</b>   | <b>10</b>    |
| <b>12</b> | <b>200</b>   | <b>100</b>   | <b>20</b>    |
| 13        | 150          | 32.95        | 15           |
| 14        | 150          | 75           | 15           |
| <b>15</b> | <b>100</b>   | <b>100</b>   | <b>20</b>    |
| 16        | 65.91        | 75           | 15           |
| <b>17</b> | <b>100</b>   | <b>50</b>    | <b>20</b>    |
| <b>18</b> | <b>100</b>   | <b>50</b>    | <b>10</b>    |
| 19        | 150          | 117.05       | 15           |

|    |        |    |    |
|----|--------|----|----|
| 20 | 234.09 | 75 | 15 |
|----|--------|----|----|

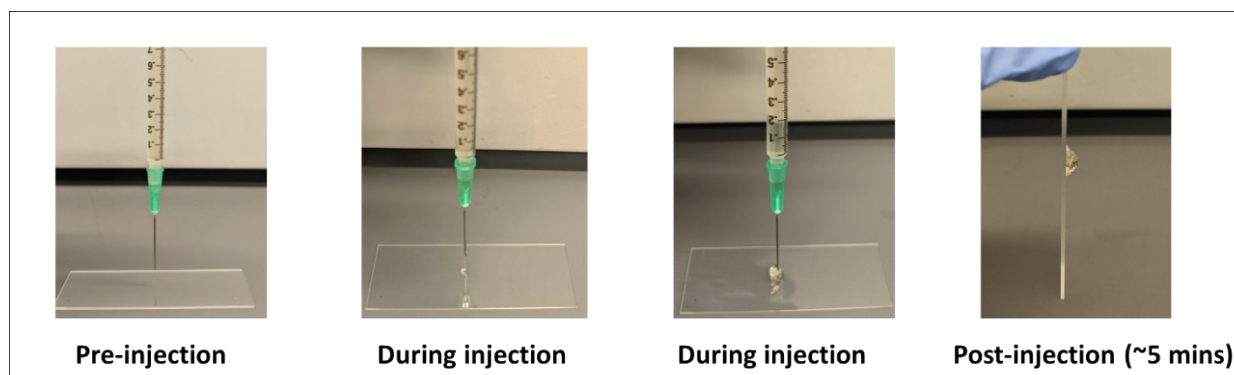

**Figure S1:** Image of PEGMC hydrogel injection through a 21-G needle pre-, during and post injection, confirming injectability of the formulation. A clear hydrogel was formed, in comparison to NCH system, which was slightly cloudy due to the presence of the NPs.

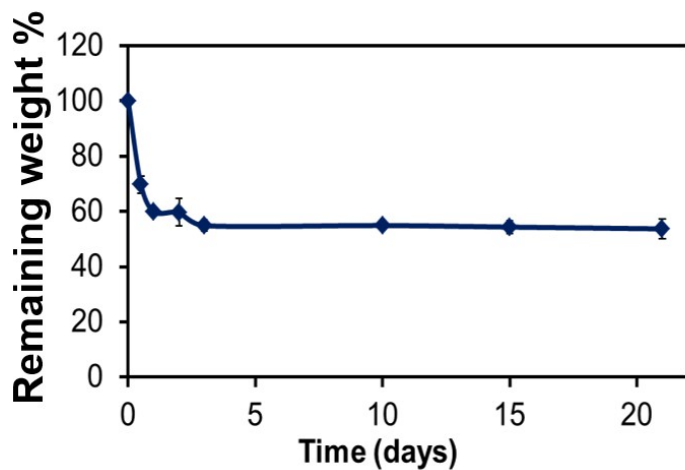

**Figure S2:** Degradation profile of NCH system studied over three weeks showing gradual degradation over time.
